# Supplementary material for: Diurnal variations of psychometric indicators in Twitter content
Source: PLoS One. 2018 Jun 20;13(6):e0197002. doi: 10.1371/journal.pone.0197002 (PMC6010242; doi:10.1371/journal.pone.0197002)
Supplement: S1 Table — (XLSX) [file pone.0197002.s001.xlsx]

## Sheet: Sheet1
Function Words		Perceptual
Meta-process	function-words	Meta-process	perception
Total pronouns	pronouns	Seeing	see
Personal pronouns	personal-pronouns	Hearing	hear
1stperssingular	I-pronouns	Feeling	feel
1stpersplural	we-pronuns	Biological Processes
2nd person	you-pronouns	Meta-process	bio
3rdperssingular	shehe-pronouns	Body	body
3rdpersplural	they-pronouns	Health/illness	health
Impersonal pronouns	impersonal-pronouns	Sexuality	sexual
Articles	articles	Ingesting	ingesting
Prepositions	prepositions	Core Drives and Needs
Auxiliary verbs	auxiliary-verbs	Meta-process	drives
Common adverbs	adverbs	Affiliation	affiliation
Conjunctions	conjunctions	Achievement	achievement
Negations	negations	Power	power
Grammar		Reward focus	focus-reward
Regular verbs	verbs	Risk/prevention focus	focus-risk
Adjectives	adjectives	Time Orientation
Comparatives	comparatives	Past focus	focus-past
Interrogatives	interrogatives	Present focus	focus-present
Numbers	numbers	Future focus	focus-future
Quantifiers	quantifiers	Relativity
Affect		Meta-process	relativity
Meta-process	affect	Motion	motion
Positive emotion	posemo	Space	space
Negative emotion	negemo	Time	time
Anxiety	anxiety	Personal Concerns
Anger	anger	Work	work
Sadness	sadness	Leisure	leisure
Social		Home	home
Meta-process	social	Money	money
Family	family	Religion	religion
Friends	friend	Death	death
Female referents	female-referents	Informal
Male referents	male-referents	Meta-process	informal
Cognitive		Swear words	swear
Meta-process	cognitive-processes	Netspeak	netspeak
Insight	insight	Assent	assent
Cause	causation	Nonfluencies	nonfluencies
Discrepancies	discrepancies	Fillers	fillers
Tentativeness	tentatativeness
Certainty	certainty
Differentiation	differentiation
